# Supplementary material for: Using Odd-Alkanes as a Carbon Source to Increase the Content of Nutritionally Important Fatty Acids inCandida krusei, Trichosporon cutaneum,andYarrowia lipolytica
Source: Hindawi journal article supplement (doi:10.1155/2017/8195329), 2017-01-01

Table 1S Effect of different substrates (pentadecane C15; heptadecane C17 in concentration 1 g/L or 3 g/L) with or without presence of rhamnolipid (R) or glucose (G) on biomass yield (X), total lipid production (L) and lipid yield (L/X), the proportion of saturated, unsaturated, odd and even fatty acids by three yeast strains provided with standard deviations

| Candida crusei        |       |                   |            |      |            |      |             |      |           |      |           |      |            |      |                   |      |             |      |             |      |             |      |             |      |             |      |             |      |             |      |             |      |             |  |
|-----------------------|-------|-------------------|------------|------|------------|------|-------------|------|-----------|------|-----------|------|------------|------|-------------------|------|-------------|------|-------------|------|-------------|------|-------------|------|-------------|------|-------------|------|-------------|------|-------------|------|-------------|--|
| S                     | CH    | L/X<br>(%<br>w/w) | L<br>(g/L) | S.D. | X<br>(g/L) | S.D. | unsat<br>FA | S.D. | sat<br>FA | S.D. | odd<br>FA | S.D. | even<br>FA | S.D. | odd/even<br>ratio | 15:0 | S.D.<br>(%) | 15:1 | S.D.<br>(%) | 16:0 | S.D.<br>(%) | 16:1 | S.D.<br>(%) | 17:0 | S.D.<br>(%) | 17:1 | S.D.<br>(%) | 18:0 | S.D.<br>(%) | 18:1 | S.D.<br>(%) | 18:2 | S.D.<br>(%) |  |
| G+C15                 | 1C15  | 17.40             | 0.86       | 0.04 | 4.94       | 0.26 | 66.9        | 4.92 | 33.1      | 5.10 | 1.6       | 5.12 | 98.4       | 5.12 | 0.016             | 0.6  | 5.24        | 0.5  | 4.86        | 21.1 | 4.96        | 11.0 | 4.95        | 0.0  | 5.17        | 0.5  | 4.91        | 11.4 | 4.92        | 15.3 | 5.21        | 39.6 | 4.99        |  |
| G+C15                 | R1C15 | 20.70             | 1.19       | 0.06 | 5.75       | 0.29 | 73.7        | 5.17 | 26.3      | 5.14 | 6.1       | 4.82 | 93.9       | 4.82 | 0.065             | 1.3  | 5.25        | 2.3  | 4.85        | 16.6 | 5.13        | 9.8  | 4.93        | 0.9  | 5.01        | 1.6  | 4.91        | 7.5  | 5.14        | 33.5 | 5.25        | 26.5 | 5.1         |  |
| G+C15                 | 3C15  | 16.05             | 1.01       | 0.05 | 6.31       | 0.31 | 67.5        | 5.05 | 32.5      | 5.16 | 1.0       | 5.15 | 99.0       | 5.15 | 0.010             | 0.6  | 4.9         | 0.0  | 5.05        | 24.2 | 5.24        | 11.1 | 5.15        | 0.2  | 5.15        | 0.2  | 5.11        | 7.5  | 4.90        | 13.3 | 4.96        | 42.9 | 5.19        |  |
| G+C15                 | R3C15 | 20.40             | 1.37       | 0.07 | 6.69       | 0.34 | 73.4        | 5.02 | 26.6      | 5.13 | 8.1       | 5.34 | 91.9       | 5.34 | 0.088             | 1.1  | 5.10        | 5.0  | 5.17        | 16.4 | 5.12        | 9.8  | 4.94        | 1.1  | 5           | 0.9  | 5.19        | 8.0  | 5.25        | 35.7 | 4.96        | 22.0 | 5.24        |  |
| G+C17                 | 1C17  | 20.40             | 1.12       | 0.06 | 5.49       | 0.29 | 72.3        | 5.32 | 27.7      | 5.10 | 2.2       | 5.09 | 97.8       | 5.09 | 0.022             | 0.4  | 5.07        | 0.6  | 5.05        | 21.4 | 5.25        | 11.0 | 5.07        | 0.4  | 5.15        | 0.8  | 4.99        | 5.5  | 5.16        | 17.5 | 4.86        | 42.4 | 5.1         |  |
| G+C17                 | R1C17 | 21.30             | 1.29       | 0.07 | 6.05       | 0.30 | 73.8        | 5.30 | 26.2      | 5.12 | 10.6      | 5.07 | 89.4       | 5.07 | 0.119             | 0.9  | 5.03        | 1.2  | 5.06        | 14.6 | 5.11        | 9.2  | 4.95        | 4.2  | 5.25        | 4.3  | 5.09        | 6.5  | 5.24        | 38.2 | 5.14        | 20.9 | 5.15        |  |
| G+C17                 | 3C17  | 23.70             | 1.16       | 0.06 | 4.88       | 0.25 | 73.5        | 5.34 | 26.5      | 4.97 | 3.6       | 5.33 | 96.4       | 5.33 | 0.037             | 0.5  | 4.92        | 2.0  | 4.95        | 19.9 | 5.23        | 10.7 | 5.10        | 0.4  | 5.18        | 0.7  | 5.01        | 5.7  | 4.95        | 18.3 | 4.97        | 41.8 | 5.01        |  |
| G+C17                 | R3C17 | 21.15             | 1.40       | 0.07 | 6.60       | 0.34 | 73.1        | 5.15 | 26.9      | 5.16 | 13.4      | 5.33 | 86.6       | 5.33 | 0.155             | 0.6  | 4.88        | 0.8  | 5.12        | 15.9 | 5.17        | 8.9  | 4.87        | 5.1  | 5.21        | 6.9  | 5.17        | 5.3  | 5.24        | 32.1 | 5.05        | 24.4 | 4.97        |  |
| C15                   | 1C15  | 13.65             | 0.07       | 0.00 | 0.50       | 0.03 | 73.6        | 5.14 | 26.4      | 5.24 | 5.5       | 4.86 | 94.5       | 4.86 | 0.058             | 1.2  | 5.22        | 1.7  | 5.15        | 16.7 | 4.91        | 10.0 | 5.14        | 1.0  | 5.18        | 1.6  | 5.21        | 7.5  | 5.19        | 33.8 | 4.91        | 26.5 | 5.16        |  |
| C15                   | R1C15 | 14.70             | 0.09       | 0.00 | 0.58       | 0.03 | 69.4        | 5.11 | 30.6      | 5.11 | 11.9      | 5.01 | 88.1       | 5.01 | 0.135             | 7.3  | 5.18        | 2.1  | 4.82        | 21.2 | 5.21        | 10.9 | 5.2         | 1.0  | 5.17        | 1.5  | 4.88        | 1.1  | 5.23        | 15.3 | 5.25        | 39.6 | 5.23        |  |
| C15                   | 3C15  | 13.50             | 0.08       | 0.00 | 0.57       | 0.03 | 73.6        | 5.07 | 26.4      | 5.07 | 7.3       | 5.18 | 92.7       | 5.18 | 0.079             | 0.7  | 5.28        | 4.5  | 5.11        | 16.6 | 5.24        | 9.9  | 5.29        | 1.1  | 5.16        | 1.0  | 5.01        | 8.0  | 4.89        | 35.9 | 5.13        | 22.3 | 5.12        |  |
| C15                   | R3C15 | 15.15             | 0.10       | 0.01 | 0.64       | 0.03 | 65.4        | 5.15 | 34.6      | 5.15 | 18.8      | 5.21 | 81.2       | 5.21 | 0.232             | 11.1 | 5.31        | 4.6  | 4.8         | 21.3 | 5.24        | 9.7  | 4.81        | 1.4  | 5.07        | 1.7  | 5.06        | 0.8  | 5.11        | 11.7 | 5.22        | 37.7 | 4.92        |  |
| C17                   | 1C17  | 15.30             | 0.09       | 0.00 | 0.59       | 0.03 | 76.4        | 5.06 | 23.6      | 5.21 | 5.5       | 5.12 | 94.5       | 5.12 | 0.058             | 0.6  | 5.22        | 2.9  | 4.94        | 15.4 | 4.93        | 9.7  | 5.22        | 0.7  | 5.14        | 1.3  | 4.86        | 6.9  | 5.20        | 40.3 | 4.92        | 22.2 | 5.24        |  |
| C17                   | R1C17 | 15.00             | 0.11       | 0.01 | 0.73       | 0.04 | 72.8        | 5.09 | 27.2      | 5.09 | 27.8      | 5.35 | 72.2       | 5.35 | 0.385             | 0.7  | 5.15        | 0.6  | 5.25        | 16.6 | 5.24        | 8.5  | 5.31        | 9.6  | 5.02        | 16.9 | 4.96        | 0.3  | 5.18        | 13.6 | 4.92        | 33.2 | 4.99        |  |
| C17                   | 3C17  | 18.45             | 0.14       | 0.01 | 0.78       | 0.04 | 73.2        | 4.89 | 26.8      | 4.93 | 12.5      | 5.19 | 87.5       | 5.19 | 0.143             | 1.0  | 4.82        | 1.3  | 4.82        | 16.0 | 5.16        | 9.0  | 4.96        | 4.4  | 4.94        | 5.8  | 5.18        | 5.4  | 4.88        | 32.5 | 5.11        | 24.6 | 5.14        |  |
| C17                   | R3C17 | 16.95             | 0.14       | 0.01 | 0.81       | 0.04 | 70.2        | 5.01 | 29.8      | 5.15 | 33.5      | 5.07 | 66.5       | 5.07 | 0.504             | 0.7  | 4.85        | 0.9  | 4.93        | 14.5 | 5.22        | 7.8  | 4.91        | 14.4 | 4.9         | 17.5 | 5.03        | 0.2  | 5.17        | 13.4 | 4.91        | 30.6 | 5.19        |  |
| Trichosporon cutaneum |       |                   |            |      |            |      |             |      |           |      |           |      |            |      |                   |      |             |      |             |      |             |      |             |      |             |      |             |      |             |      |             |      |             |  |
| S                     | CH    | L/X<br>(%<br>w/w) | L<br>(g/L) | S.D. | X<br>(g/L) | S.D. | unsat<br>FA | S.D. | sat<br>FA | S.D. | odd<br>FA | S.D. | even<br>FA | S.D. | odd/even<br>ratio | 15:0 | S.D.<br>(%) | 15:1 | S.D.<br>(%) | 16:0 | S.D.<br>(%) | 16:1 | S.D.<br>(%) | 17:0 | S.D.<br>(%) | 17:1 | S.D.<br>(%) | 18:0 | S.D.<br>(%) | 18:1 | S.D.<br>(%) | 18:2 | S.D.<br>(%) |  |
| G+C15                 | 1C15  | 31.80             | 0.58       | 0.03 | 1.83       | 0.09 | 84.0        | 5.21 | 16.0      | 5.08 | 0.9       | 5.16 | 99.1       | 5.16 | 0.009             | 0.2  | 5.20        | 0.3  | 5.17        | 13.8 | 5.13        | 2.5  | 5.09        | 0.1  | 5.19        | 0.3  | 4.96        | 1.9  | 5.15        | 29.4 | 5.19        | 51.5 | 4.88        |  |
| G+C15                 | R1C15 | 33.40             | 1.50       | 0.07 | 4.49       | 0.24 | 83.6        | 5.03 | 16.4      | 5.21 | 1.3       | 5.15 | 98.7       | 5.15 | 0.013             | 0.3  | 5.21        | 0.5  | 4.92        | 14.1 | 4.89        | 2.6  | 4.92        | 0.2  | 4.88        | 0.3  | 5.17        | 1.8  | 5.06        | 27.5 | 5.09        | 52.7 | 5.25        |  |
| G+C15                 | 3C15  | 30.90             | 0.60       | 0.03 | 1.94       | 0.10 | 82.9        | 4.91 | 17.1      | 5.1  | 1.2       | 5.00 | 98.8       | 5.00 | 0.012             | 0.2  | 5.07        | 0.4  | 5.02        | 14.7 | 5.18        | 2.1  | 5.14        | 0.2  | 5.07        | 0.4  | 4.92        | 2.0  | 5.01        | 26.7 | 4.91        | 53.3 | 5.26        |  |
| G+C15                 | R3C15 | 32.80             | 2.37       | 0.12 | 7.22       | 0.36 | 83.6        | 4.99 | 16.4      | 5.01 | 1.9       | 5.06 | 98.1       | 5.06 | 0.019             | 0.4  | 4.93        | 0.8  | 4.95        | 13.8 | 5.07        | 2.8  | 4.91        | 0.3  | 4.98        | 0.4  | 5.24        | 1.9  | 4.87        | 28.4 | 5.06        | 51.2 | 5.09        |  |
| G+C17                 | 1C17  | 32.70             | 0.76       | 0.04 | 2.32       | 0.12 | 83.8        | 4.93 | 16.2      | 5.24 | 0.9       | 4.88 | 99.1       | 4.88 | 0.009             | 0.0  | 5.24        | 0.0  | 5.26        | 14.2 | 5.00        | 2.8  | 5.25        | 0.5  | 4.91        | 0.4  | 4.91        | 1.5  | 5.34        | 28.1 | 5.09        | 52.5 | 4.85        |  |
| G+C17                 | R1C17 | 31.60             | 1.44       | 0.07 | 4.56       | 0.24 | 82.0        | 4.87 | 18.0      | 4.99 | 0.9       | 5.04 | 99.1       | 5.04 | 0.009             | 0.0  | 5.15        | 0.1  | 5.23        | 15.7 | 5.19        | 2.2  | 5.01        | 0.3  | 5.1         | 0.5  | 5.02        | 2.0  | 5.11        | 28.6 | 5.07        | 50.6 | 5.22        |  |
| G+C17                 | 3C17  | 31.80             | 0.70       | 0.04 | 2.19       | 0.11 | 82.8        | 5.07 | 17.2      | 5.18 | 1.0       | 5.13 | 99.0       | 5.13 | 0.010             | 0.0  | 5.12        | 0.1  | 4.89        | 15.3 | 5.17        | 2.9  | 4.93        | 0.3  | 4.85        | 0.6  | 4.98        | 1.6  | 5.18        | 26.4 | 5.12        | 52.8 | 5.14        |  |
| G+C17                 | R3C17 | 30.70             | 1.59       | 0.08 | 5.19       | 0.27 | 83.4        | 4.95 | 16.6      | 5.22 | 1.4       | 5.24 | 98.6       | 5.24 | 0.014             | 0.0  | 5.01        | 0.2  | 4.86        | 14.6 | 5.21        | 2.3  | 5.13        | 0.5  | 5.14        | 0.7  | 5.03        | 1.5  | 5.25        | 28.1 | 4.85        | 52.1 | 5.25        |  |
| C15                   | 1C15  | 29.20             | 0.02       | 0.00 | 0.07       | 0.00 | 84.2        | 4.86 | 15.8      | 5.19 | 1.4       | 5.16 | 98.6       | 5.16 | 0.014             | 0.4  | 5.12        | 0.7  | 5.16        | 14.0 | 5.08        | 2.2  | 4.93        | 0.2  | 5.1         | 0.1  | 4.95        | 1.2  | 4.88        | 23.3 | 5.07        | 57.9 | 5.16        |  |
| C15                   | R1C15 | 23.20             | 0.04       | 0.00 | 0.19       | 0.01 | 77.1        | 4.87 | 22.9      | 5.16 | 18.3      | 4.91 | 818        |      |                   |      |             |      |             |      |             |      |             |      |             |      |             |      |             |      |             |      |             |  |

Table continues on next page

| Yarrowia lipolytica |       |                   |            |      |            |      |             |             |           |             |           |             |            |             |                   |      |             |      |             |      |             |      |             |      |             |      |             |      |             |      |             |      |             |
|---------------------|-------|-------------------|------------|------|------------|------|-------------|-------------|-----------|-------------|-----------|-------------|------------|-------------|-------------------|------|-------------|------|-------------|------|-------------|------|-------------|------|-------------|------|-------------|------|-------------|------|-------------|------|-------------|
| S                   | CH    | L/X<br>(%<br>w/w) | L<br>(g/L) | S.D. | X<br>(g/L) | S.D. | unsat<br>FA | S.D.<br>(%) | sat<br>FA | S.D.<br>(%) | odd<br>FA | S.D.<br>(%) | even<br>FA | S.D.<br>(%) | odd/even<br>ratio | 15:0 | S.D.<br>(%) | 15:1 | S.D.<br>(%) | 16:0 | S.D.<br>(%) | 16:1 | S.D.<br>(%) | 17:0 | S.D.<br>(%) | 17:1 | S.D.<br>(%) | 18:0 | S.D.<br>(%) | 18:1 | S.D.<br>(%) | 18:2 | S.D.<br>(%) |
| C15                 | R1C15 | 17.50             | 0.16       | 0.01 | 0.89       | 0.04 | 69.5        | 4.91        | 30.5      | 5.14        | 33.8      | 4.9         | 66.2       | 4.9         | 0.511             | 11.3 | 5.25        | 14.5 | 4.88        | 14.2 | 5.13        | 14.2 | 5.24        | 4.1  | 5.05        | 3.9  | 5.07        | 0.9  | 4.89        | 28.4 | 5.07        | 8.5  | 4.96        |
| C15                 | 3C15  | 13.50             | 0.37       | 0.02 | 2.73       | 0.13 | 87.8        | 5.10        | 12.2      | 5.07        | 1.3       | 4.95        | 98.7       | 4.95        | 0.013             | 0.4  | 4.93        | 0.7  | 5.12        | 10.8 | 4.86        | 14.9 | 4.96        | 0.1  | 5.25        | 0.1  | 5.12        | 0.9  | 4.99        | 52.7 | 5.24        | 19.4 | 4.98        |
| C15                 | R3C15 | 17.20             | 0.47       | 0.02 | 2.75       | 0.14 | 67.4        | 5.16        | 32.6      | 5           | 44.5      | 4.94        | 55.5       | 4.94        | 0.802             | 15.6 | 4.98        | 19.8 | 5.05        | 11.7 | 5.04        | 10.8 | 5.19        | 4.6  | 5.05        | 4.5  | 5.01        | 0.7  | 4.97        | 24.7 | 5.02        | 7.6  | 5.21        |
| C17                 | 1C17  | 12.80             | 0.10       | 0.00 | 0.74       | 0.04 | 87.0        | 4.92        | 13.0      | 5.17        | 0.4       | 5           | 99.6       | 5           | 0.004             | 0.0  | 4.87        | 0.1  | 5.03        | 12.1 | 5.07        | 10.8 | 5.11        | 0.1  | 4.99        | 0.2  | 5.08        | 0.8  | 4.93        | 60.0 | 5.06        | 15.9 | 5.17        |
| C17                 | R1C17 | 17.20             | 0.13       | 0.01 | 0.74       | 0.04 | 75.5        | 4.89        | 24.5      | 4.97        | 25.2      | 5.1         | 74.8       | 5.1         | 0.337             | 0.4  | 5.21        | 0.2  | 5.12        | 12.9 | 4.93        | 13.0 | 4.99        | 10.4 | 5.17        | 14.2 | 4.97        | 0.8  | 5.14        | 40.9 | 5.02        | 7.2  | 5.04        |
| C17                 | 3C17  | 12.40             | 0.34       | 0.02 | 2.72       | 0.14 | 87.1        | 5.18        | 12.9      | 4.98        | 0.7       | 4.86        | 99.3       | 4.86        | 0.007             | 0.1  | 4.9         | 0.2  | 5.19        | 11.7 | 5.12        | 12.3 | 4.93        | 0.1  | 5.14        | 0.3  | 5.01        | 1.0  | 4.97        | 57.5 | 4.97        | 16.8 | 5.04        |
| C17                 | R3C17 | 17.00             | 0.46       | 0.02 | 2.73       | 0.14 | 73.3        | 5.11        | 26.7      | 4.89        | 31.3      | 4.99        | 68.7       | 4.99        | 0.456             | 0.5  | 4.97        | 0.5  | 5.13        | 13.7 | 4.94        | 12.5 | 4.89        | 12.4 | 5.05        | 17.9 | 5.02        | 0.1  | 5.08        | 34.5 | 4.88        | 7.9  | 5.17        |

Fig. 1S Growth curves of *T. cutaneum* on glucose with pentadecane (A) and glucose with heptadecane (B) as a carbon source (R = addition of rhamnolipid).

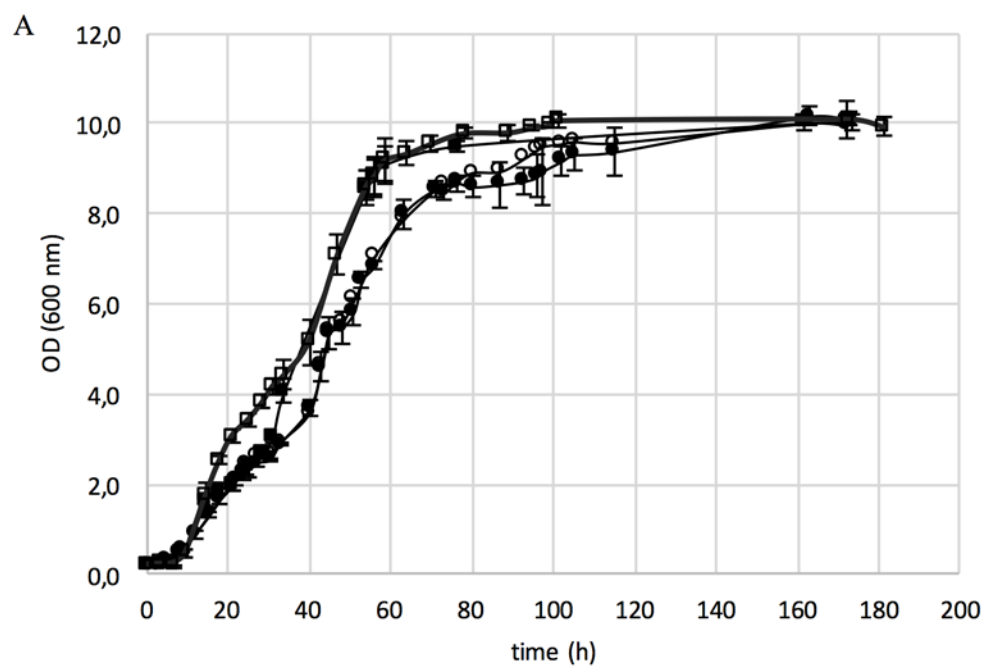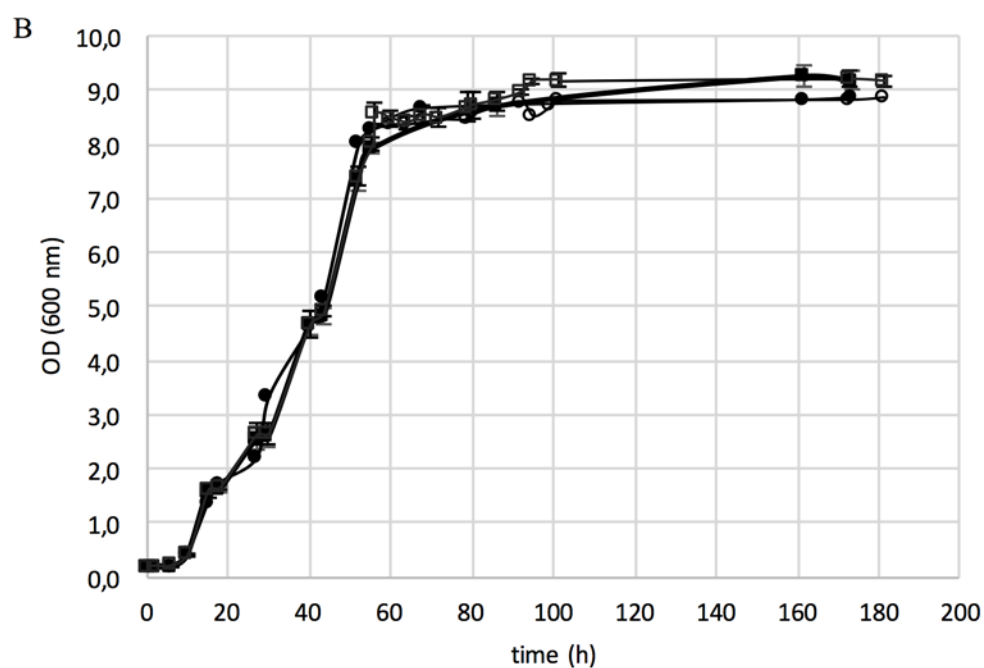

Fig. 2S Growth curves of *T. cutaneum* on pentadecane (A) and heptadecane (B) as a sole carbon source (R = addition of rhamnolipid).

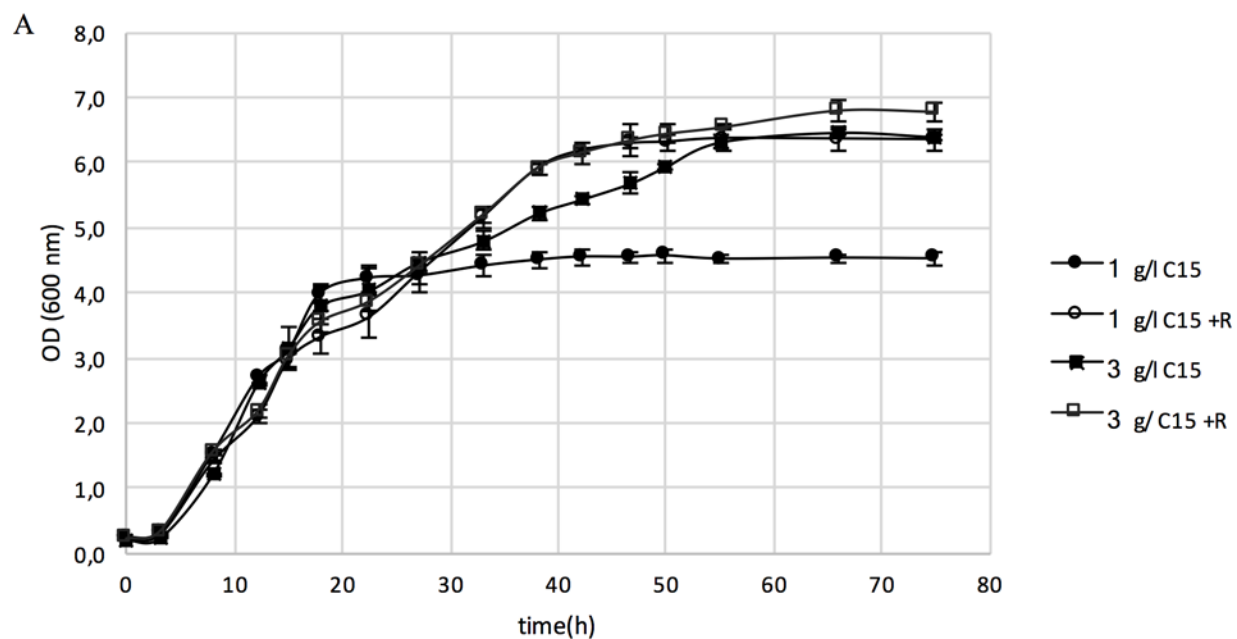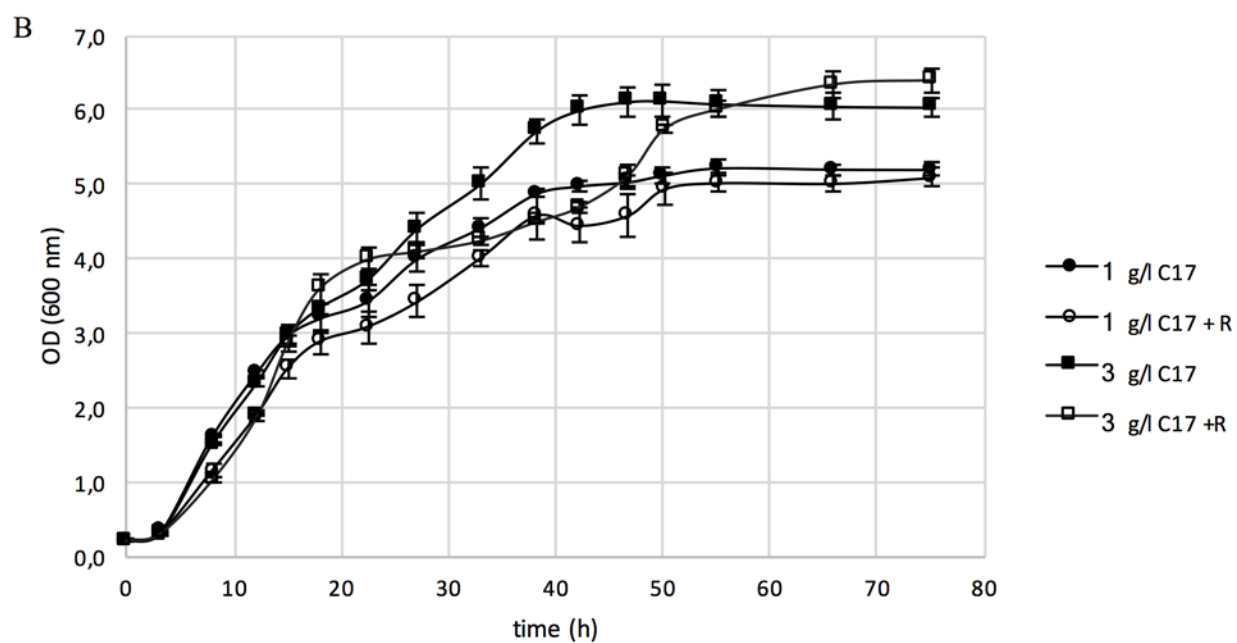

Fig. 3S Growth curves of *C. krusei* on glucose with pentadecane (A) and glucose with heptadecane (B) as a carbon source (R = addition of rhamnolipid).

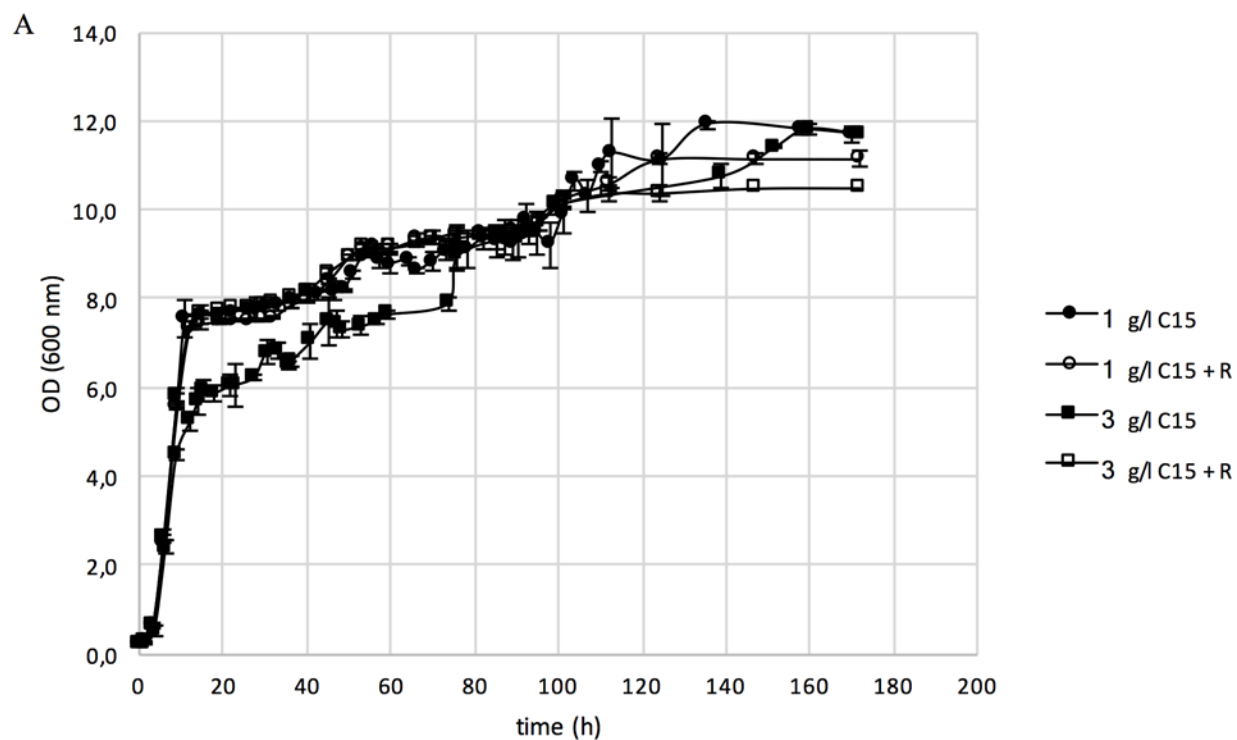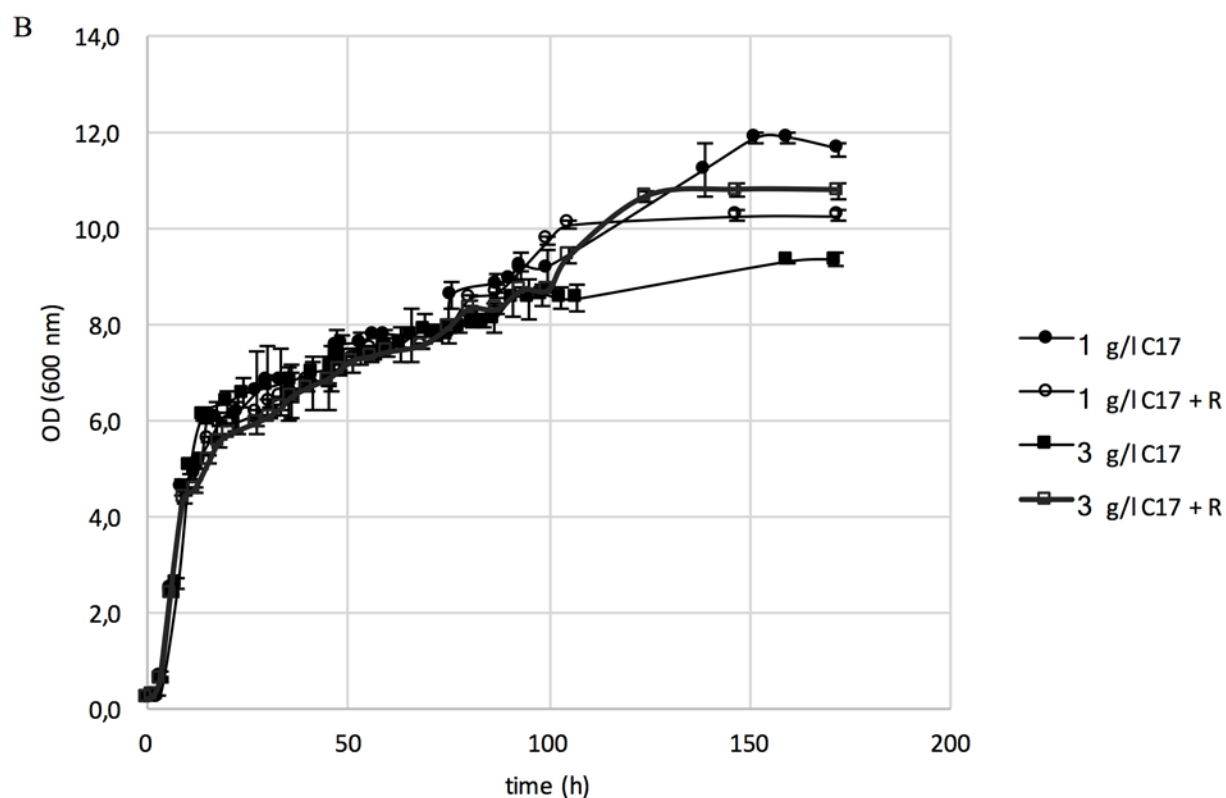

Fig. 4S Growth curves of *C. krusei* on pentadecane (A) and heptadecane (B) as a sole carbon source (R = addition of rhamnolipid).

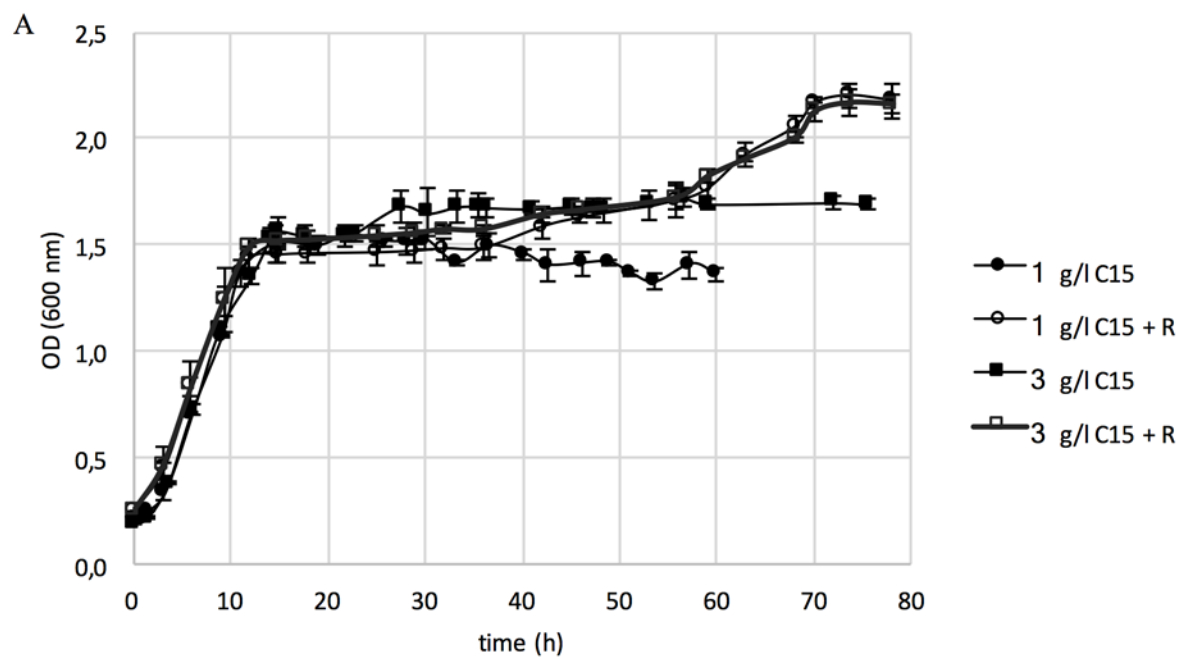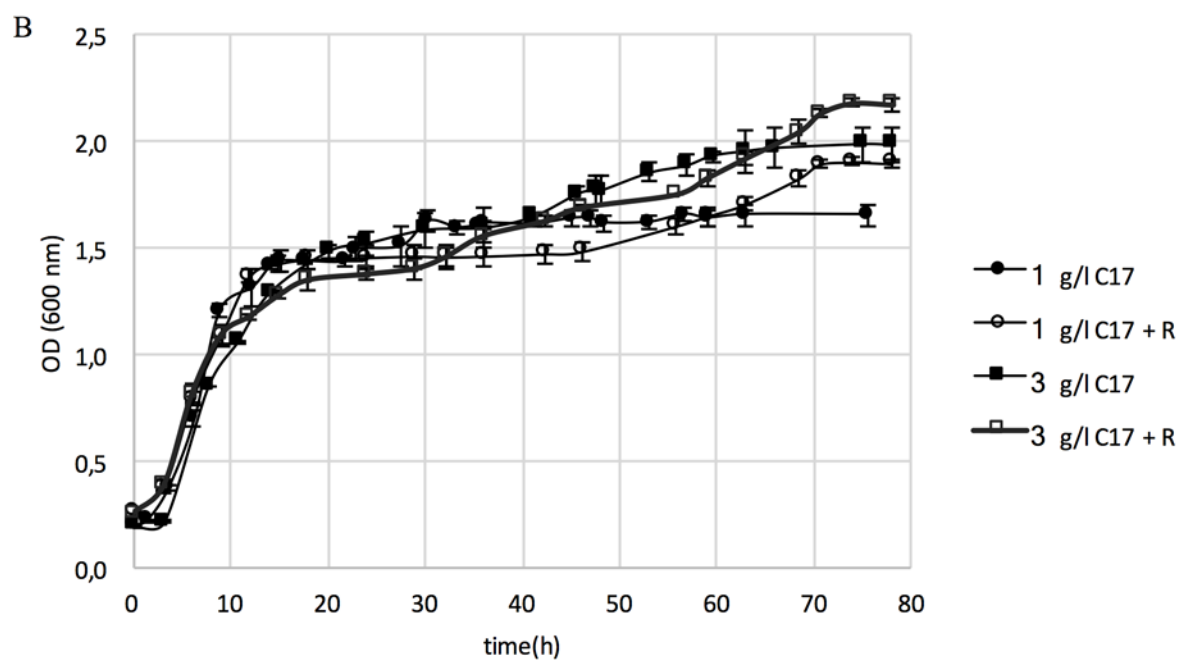

Supplement: f1 [file 8195329.f1.pdf]
